# Supplementary material
Source: PubMed Central journal article supplement (PMC4326747)
Supplement: supp_pp.114.254409_254409Supplementals.pdf [file supp_pp.114.254409_254409Supplementals.pdf]

# Supplemental Materials for

## **Protein phosphatase 2A holoenzyme is targeted to peroxisomes by piggybacking and positively affects peroxisomal $\beta$ -oxidation**

Amr R.A. Kataya<sup>1</sup>, Behzad Heidari<sup>1</sup>, Lars Hagen<sup>3</sup>, Roald Kommedal<sup>2</sup>, Geir Slupphaug<sup>3</sup>, Cathrine Lillo<sup>1\*</sup>

University of Stavanger, <sup>1</sup>Centre for Organelle Research, <sup>2</sup>Department of Mathematics and Natural Sciences, Faculty of Science and Technology, N-4036 Stavanger, Norway. <sup>3</sup>Department of Cancer Research and Molecular Medicine, Norwegian University of Science and Technology, NO-7489 Trondheim, Norway

\*Corresponding author: Cathrine Lillo, [Cathrine.lillo@uis.no](mailto:Cathrine.lillo@uis.no)

### **The file includes:**

Supplemental Fig. S1. Identification of PP2A in peroxisomes and constructing BiFC recombinant genes.

Supplemental Fig. S2. Clustering and co-expression of *Arabidopsis* PP2A subunits C and A with B' $\theta$ .

Supplemental Fig. S3. Identification of PP2A complexes in peroxisomes of onion epidermal cells.

Supplemental Fig. S4. Gene expression profiles of *Arabidopsis* PP2A subunits C, A and B' $\theta$  in response to various stimuli.

Supplemental Fig. S5. PP2A subunits C5 and B' $\theta$  show high expression during senescence.

Supplemental Table S6. Summary of phosphorylated peroxisomal proteins involved in  $\beta$ -oxidation, glyoxylate cycle and PTS1 import

Supplemental Fig. S7. PP2A B' $\theta$  homologs sequence alignments.

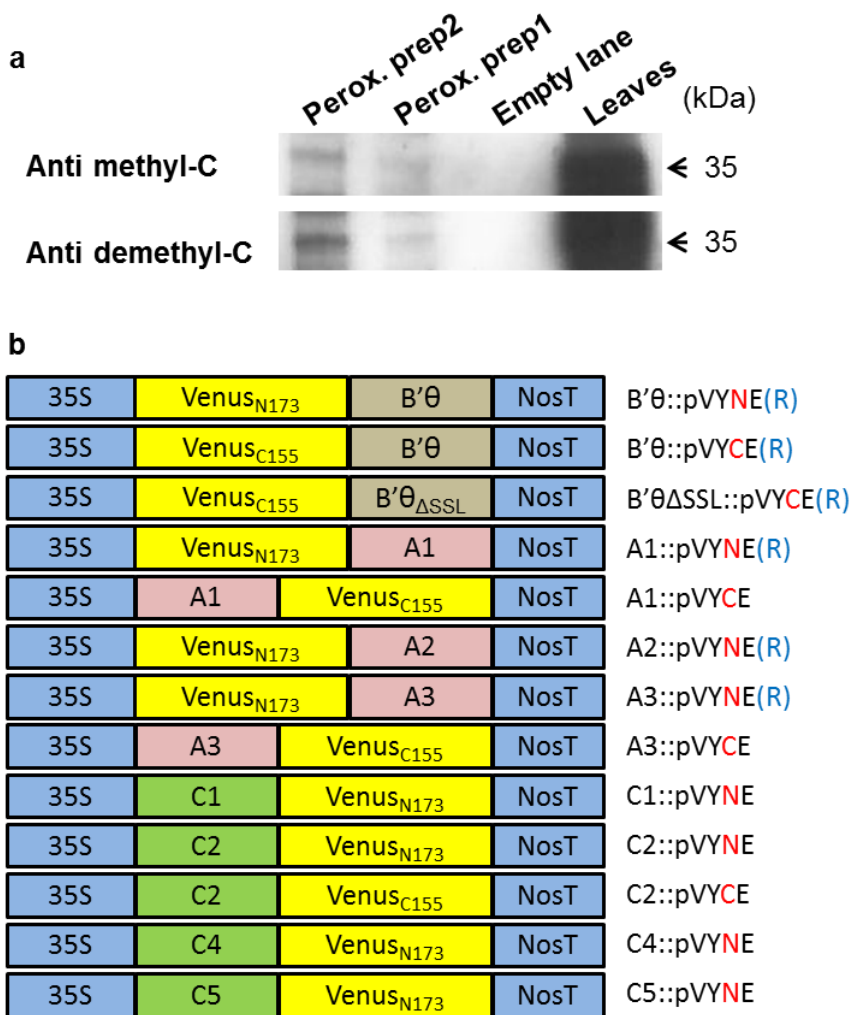

**Supplemental Figure S1.** Identification of PP2A in peroxisomes and constructing BiFC recombinant genes. (a) Catalytic subunit detection in isolated *A. thaliana* peroxisomes by Western blotting with specific antibodies against methylated (upper panel) and demethylated (lower panel) C-terminal end of PP2A-C. Two preparations of peroxisomes were used together with *A. thaliana* leaf extract (5-week-old plants) as a control. The detected band equals to 35 kDa. (b) Schematic representation of generated BiFC vectors. PP2A subunits (*B' $\theta$* , *C*, *A*) were inserted in pVYNE, pVYCE, pVYNE(R) and pVYCE(R) (Waadt et al., 2008). 35S, promoter of the cauliflower mosaic virus (CaMV); Venus<sub>N173</sub>, N-terminal fragment of YFP (Venus type) amino acids 1–173; Venus<sub>C155</sub>, C-terminal fragment of YFP amino acids 156–239; NosT, terminator of the Nos gene; (R) indicates right and a free C-terminus of the protein of interest.

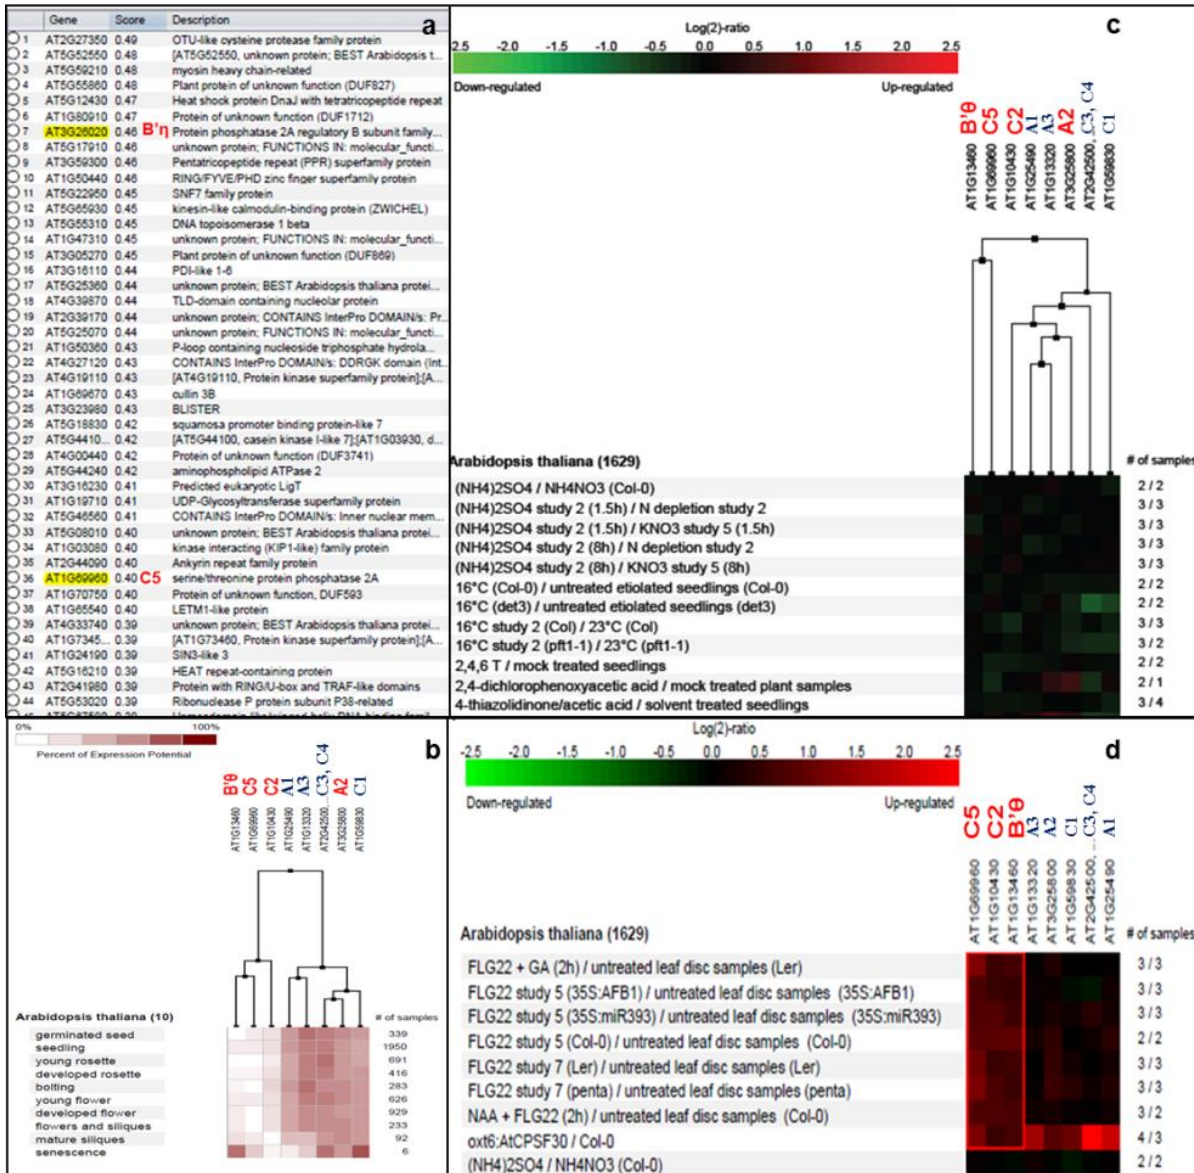

**Supplemental Figure S2.** Clustering and co-expression of *Arabidopsis* PP2A subunits C and A with B'θ. The expression analyses support the identification of C5 and C2 as interacting partners of B'θ. (a) List of genes co-expressed with B'θ according to the co-expression tool of external stimuli. (b-d) Gene expression profiles based on microarray data were clustered according to similarity in expression patterns. (b) Hierarchical clustering in the case of plant development and (c) Hierarchical clustering of various stimuli, (d) Biclustering. Hierarchical clustering is grouping genes based on similar expression in all conditions. Biclustering tool identifies groups of genes that exhibit similarity only in a subset of conditions, irrespective of their profiles in other conditions. The figures are from an output result of MetaAnalyzer of GENEVESTIGATOR ([www.genevestigator.com](http://www.genevestigator.com) (Zimmermann et al., 2004)). Clustering results were generated by default settings. Results are given as heat maps coding that reflect absolute signal values.

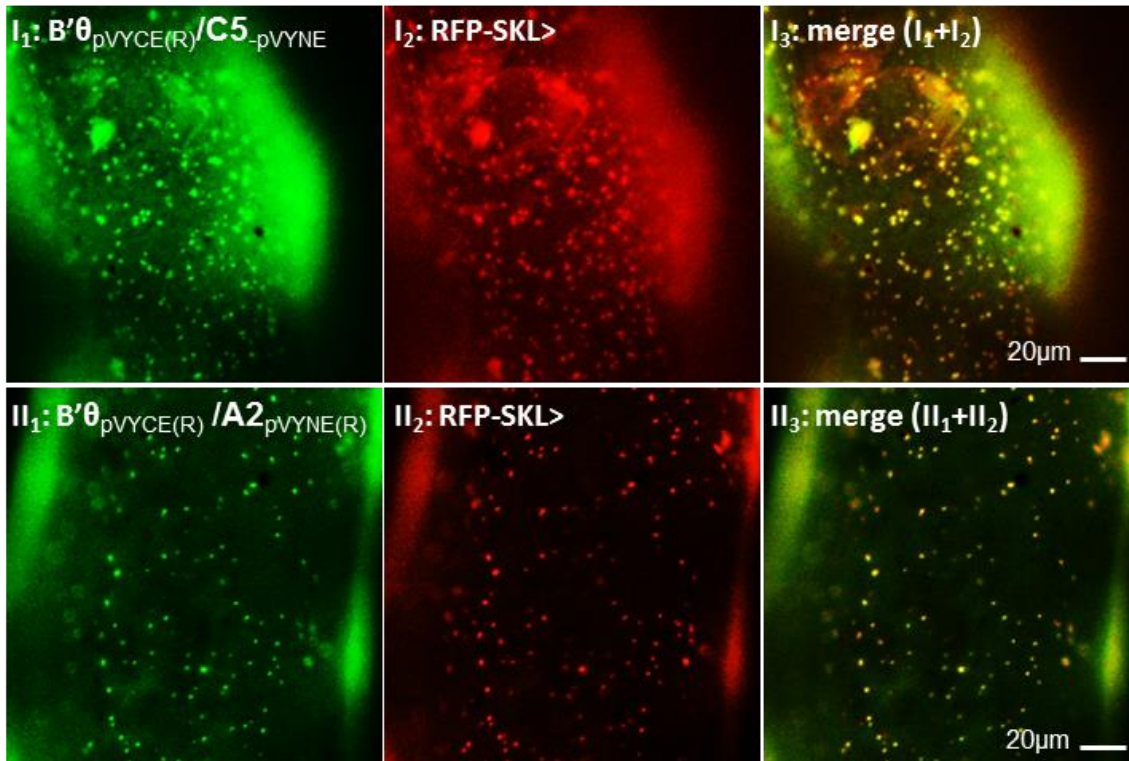

**Supplemental Figure S3.** Identification of PP2A complexes in peroxisomes of onion epidermal cells. Visualization of B'θ/C5 and B'θ/A2 complexes formation and localization into peroxisomes by BiFC. (I) Co-expression of C5-VYNE and B'θ-VYCE(R); (II) co-expression of A2-VYNE(R) and B'θ-VYCE(R). (I<sub>2</sub> and II<sub>2</sub>) Peroxisomes were labeled with RFP-SKL (Matre et al., 2009). (I<sub>3</sub> and II<sub>3</sub>) are the merged images.

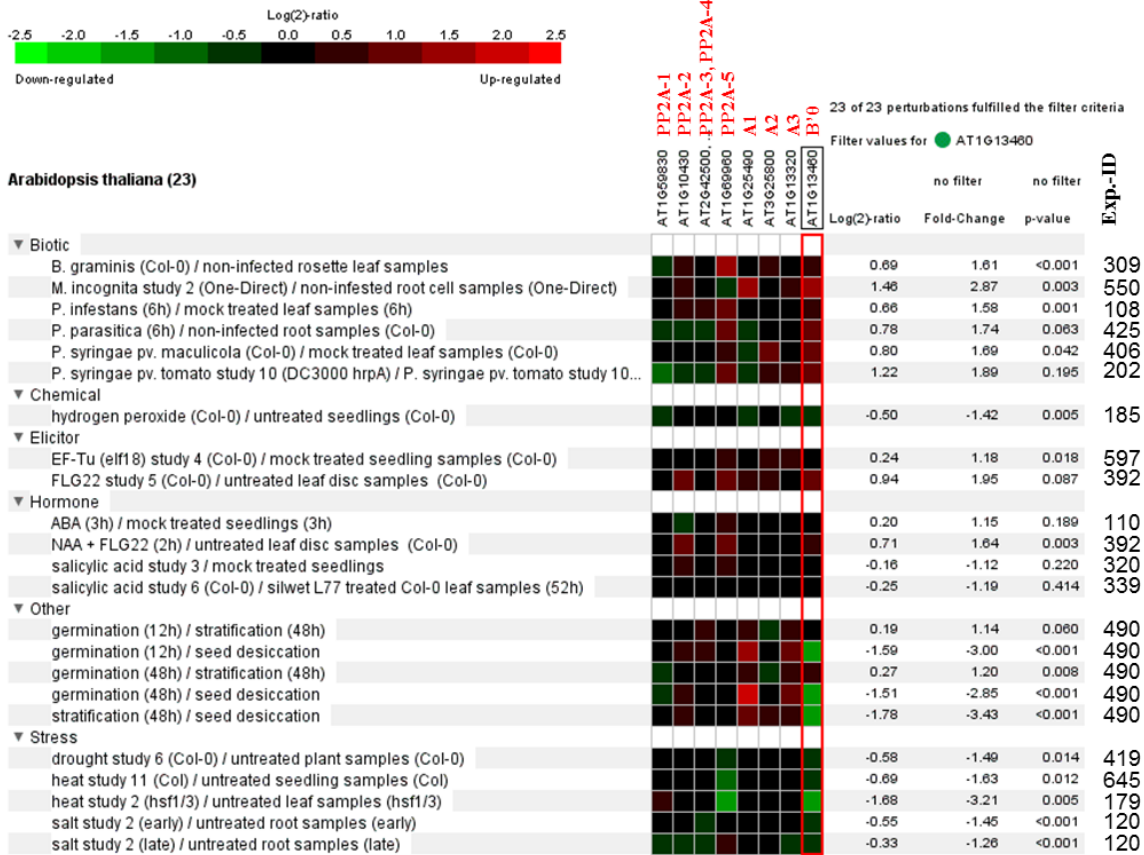

**Supplemental Figure S4.** Gene expression profiles of *Arabidopsis* PP2A subunits C, A and B'0 in response to various stimuli. Expression table obtained from *Arabidopsis* microarray experiments as reported by Genevestigator ([www.genevestigator.com](http://www.genevestigator.com) (Zimmermann et al., 2004)). The examples of perturbations used for this analysis include hormones, stress (drought, heat, and salt treatments) and others (germination and stratification conditions). The color code is in the log<sub>2</sub> scale where red represents up-regulation and the green represents down-regulation. Exp.-ID = Experiment Identifier.

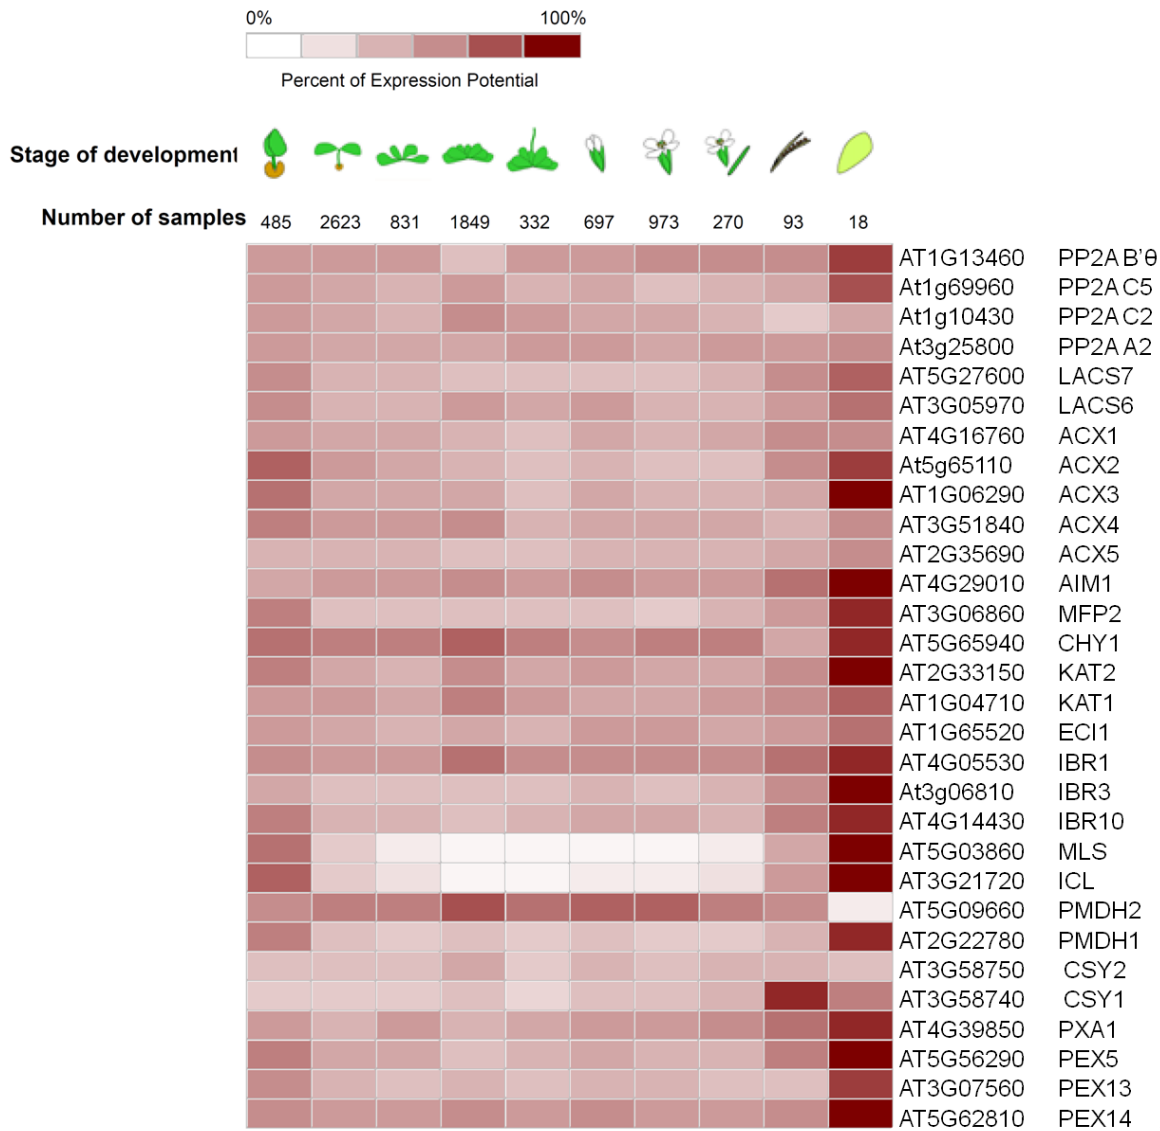

**Supplemental Figure S5.** PP2A subunits *C5* and *B'θ* show high expression during senescence. Proteins which are involved in peroxisomal  $\beta$ -oxidation, glyoxylate cycle and PTS1 import, were subjected to gene expression analysis by Genevestigator ([www.genevestigator.com](http://www.genevestigator.com) (Zimmermann et al., 2004)). The expression pattern in the developmental map show that most of the genes are up-regulated during senescence (rightmost column), as are *C5* and *B'θ*. Expression levels are given as heat maps coding that reflect absolute signal values, darker color represents stronger expression as indicated by the scale.

**Supplemental Table S6.** Summary of phosphorylated peroxisomal proteins involved in  $\beta$ -oxidation, glyoxylate cycle and PTS1 import. S indicates Serine; T is for Threonine and Y for Tyrosine. Experimentally identified phosphoproteins are summarized in columns 4-6 and extracted from PhosPhAt 4.0 (Heazlewood et al., 2008).

| AGI       | Acronym | ANOTATION                             | Experimentally detected Phospho-peptides                   | Mod. aa                            | Experimental data sources : (PhosPhAt 4.0)                                                 |
|-----------|---------|---------------------------------------|------------------------------------------------------------|------------------------------------|--------------------------------------------------------------------------------------------|
| AT3G05970 | LACS6   | Long-chain acyl-CoA synthetase 6      | IYAGIINAVK                                                 | Y363                               | PhosPhAt 4.0                                                                               |
| AT3G51840 | ACX4    | Acyl-CoA oxidase 4                    | LGAMGVAGGSIK                                               | S104                               | Nakagami et al., 2010                                                                      |
| AT4G29010 | AIM1    | Enoyl-CoA hydratase/isomerase family  | VAVIGGGLMGSGIATALLSN<br>AMNGMLLSESK                        | S331, T326<br>S712                 | Nakagami et al., 2010<br>PhosPhAt 4.0                                                      |
| AT3G06860 | MFP2    | Multifunctional protein 2             | SMIIPLMQEDK<br>SISGVKLDPK                                  | S565<br>S611                       | PhosPhAt 4.0                                                                               |
| AT1G04710 | KAT1    | Peroxisomal 3-ketoacyl-coa thiolase 4 | AASATASGKFK                                                | S219                               | PhosPhAt 4.0                                                                               |
| AT1G65520 | ECI1    | Delta(2)-enoyl CoA isomerase 1        | SDPSFSQSVLITSDGK                                           | S43, S54,<br>S47<br>T51, T52       | PhosPhAt 4.0                                                                               |
| At3g06810 | IBR3    | Acyl-CoA dehydrogenase-related        | DVSPSYESLVDGSGR                                            | S387, S389<br>Y390                 | Nakagami et al., 2010<br>Sugiyama et al., 2008                                             |
| AT3G21720 | ICL     | Isocitrate lyase                      | EARMSMSR                                                   | S154<br>S156                       | Engelsberger & Schulze 2012                                                                |
| AT3G58750 | CSY2    | Citrate synthase 2                    | FGQVVISNASR                                                | S499, S501<br>S504                 | Nakagami et al., 2010<br>Sugiyama et al., 2008                                             |
| AT4G39850 | PXA1    | Peroxisomal ABC transporter 1         | LCNGQSDDETLK<br>LIGLSVLQSGASSIAPSLRHL<br>IASLNGTTVKYVLEQDK | S59, T64,<br>S806<br>T786, T787    | Reiland et al., 2011<br>Engelsberger & Schulze 2012                                        |
| AT5G56290 | PEX5    | Peroxin 5                             | LAHTLSQDGNPK<br>DRSSIMAR                                   | S173, S174<br>S308                 | Nakagami et al., 2010<br>Wang et al., 2013                                                 |
| AT3G07560 | PEX13   | Peroxin13                             | GGMLYGELAR                                                 | Y241                               | Nakagami et al., 2010                                                                      |
| AT5G62810 | PEX14   | Peroxin 14                            | SASPPAAPADSSAPPHK<br>QRSWVPPQPPVAMAEAVE<br>AIR             | S310, S312,<br>S320, S321,<br>S427 | Wang et al., 2013<br>Reiland et al., 2009<br>Reiland et al., 2011<br>Sugiyama et al., 2008 |

At\_Btheta 1 -----MWKQILSKLPKKSSSK-----NHSSSSSS---TKSSSDNGASKSGN  
 Al 1 -----MWKQILSKLPKKSSSK-----SHSSSSSSNASTSKSSSDNGAGKPGN  
 Cr 1 -----MWKQILSKLPKKSSSK-----NHSSSTPS-ASTSKTSDNGAGKSGN  
 Es 1 -----MWKQILSKLPKKSSSK-----NHSSANAV-ASTSKSSVNGAGKSGN  
 At\_Beta 1 -----MWKQILSKLPNKKSSKHEHRGREHGGHSSSSSHTSGASTSKSTDNGAAKS--  
 Csi 1 -----MIKQILKLPKPKSSKTKGDNREHG----RNSVTHSIASITGSRSSDLGKSKSGN  
 Pv 1 -----MFNKIFSKLPKPKSSKGESEHGGSGKG--HHGVTTSSKNDSVSVSPG-GTKPG  
 Cs 1 -----MIKQIFSKLPKPKSSKGGESREHGGSHMAPSTAYASASSRGNLDLASGKSANL-  
 Sl 1 -----MIKQIFGK--KKQSK-----TAGSTSSKSDGGGKVKVGSANTV  
 Vv 1 -----MIKQIFSKLPKPKSKAVENRELGG--TAFSNNSNRSGSDVESNQFANLN  
 Os 1 -----MIKQILGRFPKPKSKSGDKDPIGRS--SPSVNPPLGPRGAERSSNLSSQTP  
 Zm 1 -----MIKQILGRLPKPKGKAGD---SRE--AAAAGNGTEPSNYSVARSMDPGNK  
 Gm 1 -----MIKQILNRLPKPKSKSGESREGGAI--LTPSSTPSTSARSDDAAGYHYANAT  
 Cmsm 1 -----MIKQILNRLPKPKSKSTEHRREGAGT--TISSSNASTSLRNDLAANHHANTG  
 At\_Bzeta 1 -----MIKQIFGKLPKPKSKSLQNDNSN--GEGGVNNSYYASNSSTTSISKPSSTSSK  
 At\_Bgamma 1 -----MIKQIFGKLPKPKSKSHNDSNPNGEGGVN-SYIIPNSGISISKPSK---  
 At\_Bdelta 1 -----MFKQILGKLPKPKTSK-----FWDNGEQTLDNNNNQGGG  
 Smo 1 -----MPGSTSVP-----SNPGSRSSSSSGPVNGLL  
 At\_Balpha 1 -----MFKKIMKGANRKAASKAE-----ANDSSMYGDFDP-GRSGPGSN  
 At\_Bbeta 1 -----MFKKIMKGGHRKPKSKSE-----ANEPSSYIGLDPNRSRSGPGSN  
 At\_Bepsilon 1 -----MFNKILKLGQKKFNKSDQ-----HHQDNNNNNNNTSTNTVVRGSR  
 Pp 1 -----MQRGTGKTDKIDASA-----SAPDVVSQAAGSRVGNVAVGAP  
 M\_RCC299 1 -----  
 Vcfn 1 -----MLKSMKQKFSGKKDASK-----NKDDSQPSTS-AKAGIP-ASSK  
 Cre 1 -----MLKSMKQKFSGKKDASK-----NKDDSQPSTS-AKAGAPAASSK  
 At\_Bkapa 1 -----MFKQFLSKLPKPKSKSD-----SGELNRSSGPIVSSPVQRSGT  
 Hs\_PPP2R5C 1 ----MPNKNKKEKESPKAGKSGKSK-----EGQDIVESEQ-----  
 Dr\_gppp2r5cb 1 ----MPNKTKKDKDPSKSAKVGKT-----AGQENSEHEQ-----  
 Hs\_Bdelta 1 ----MPYKLLKKEKEPKVAKCTAKPSSSGKD-----GGENTEEAQPQPQP  
 Sc\_RTS1 1 MMRGFKQRLIKKTTGSSSSSS--KKDKKEKE--KEKSSTTSSTSKKPASASSSHGTTHS  
 Kl 1 MMRGFKQKLIKTTGSTSSSNQKRKDKKEKEKEKESKRSPSTSGSSARSSLDKTS  
 Eg 1 MWGGCSAAGRARASGLTGPAQLIKKT-----TGSSSTQKKKDKKEGKKPGSANGAAG  
 Sp\_par1 1 -MKGIKSKMLSRGKSQDTQKSSKSKKESKKSNSHD-----SSKAPKESPSTD-----  
 Mo 1 -MRRFSQKVL SRGKDPNK--SSKNKDSKDGASSPQTAGSSRDGSNQSPVLTTPSSSSSTLN  
 Nc 1 -MKRFSQRVLSRTKDKDS--KSKKNKDAKDGATASPNSQGS-RE-ATQSPVLTTPSSSTSTLV

At\_Btheta 39 SQTQNAPPVKP-----  
 Al 42 SHTKNAPAVKP-----  
 Cr 41 SHAKNAPAVKPA-----  
 Es 41 SHTKNAPAAKPAA-----  
 At\_Beta 51 -HAKNASPAGKS-----  
 Csi 49 LNTVSPQMNS-----  
 Pv 50 NSSQNHGNRV-----  
 Cs 52 VSSFAATNSVQDVG-----  
 Sl 38 ISAPYSVSAS-----  
 Vv 50 VTSLAASNSTPITG-----  
 Os 51 V--ISSSGLSYGSG-----  
 Zm 47 R--AGNDYVPVPSG-----  
 Gm 51 ASPLSGTADSVP-G-----  
 Cmsm 51 TGSFSGPNSTLSVG-----  
 At\_Bzeta 51 SSSASGSRVANG-T-----  
 At\_Bgamma 49 -SSASNSGANGTV-----  
 At\_Bdelta 36 DEVLSQRTSSNG-----  
 Smo 28 P-----  
 At\_Balpha 38 MIVNHASRGSVPS-----  
 At\_Bbeta 39 VVSHASRGALVNS-----  
 At\_Bepsilon 41 TTPAPSSVSNGES-----  
 Pp 40 ASAGVPAS-SKVGG-----  
 M\_RCC299 1 -----  
 Vcfn 38 APAPRPVS-ATREK-----  
 Cre 39 APAPRPIS-AIREK-----  
 At\_Bkapa 39 SGGSGPVRSNS-----  
 Hs\_PPP2R5C 33 -----ISVRK-----  
 Dr\_gppp2r5cb 31 -----ASNKK-----  
 Hs\_Bdelta 45 QPQAQSQPSSNKR-----  
 Sc\_RTS1 58 SASSTGSKSTTEKQKQSGSVPSQKHHSSSTSKTKTATTPSSSSSSSRSSSVSRGSSST  
 Kl 61 RSGSTGSNAGSSRRVDSKSGSNHNNHNGSSNSN---ASGSGSSANNQNDGVPR-----  
 Eg 55 AVGGSGGRATVDKKEQKQSGAKQPKAKDAGKSGAGAAPKVKVAAKKEERS-----  
 Sp\_par1 46 -----PNS-----VIG-----AQNDFL-----  
 Mo 59 -DIRNKPLPPNNASPHSTEGASPSGQPMTQNQGGSDRFGLMGGLSPASNGGS-----  
 Nc 57 NDSRNKPLPPNAA-HGDHGNMGLPGGNSNPGAADRFSSIGGQQGANGGS-----



|              |     |                                                              |
|--------------|-----|--------------------------------------------------------------|
| At_Btheta    | 50  | -----                                                        |
| Al           | 53  | -----                                                        |
| Cr           | 53  | -----                                                        |
| Es           | 54  | -----                                                        |
| At_Beta      | 62  | -----                                                        |
| Csi          | 60  | -----                                                        |
| Pv           | 60  | -----                                                        |
| Cs           | 66  | -----                                                        |
| Sl           | 48  | -----                                                        |
| Vv           | 64  | -----                                                        |
| Os           | 63  | -----                                                        |
| Zm           | 59  | -----                                                        |
| Gm           | 64  | -----                                                        |
| Cmsm         | 65  | -----                                                        |
| At_Bzeta     | 64  | -----                                                        |
| At_Bgamma    | 62  | -----                                                        |
| At_Bdelta    | 48  | -----                                                        |
| Smo          | 29  | -----                                                        |
| At_Balpha    | 52  | -----                                                        |
| At_Bbeta     | 53  | -----                                                        |
| At_Bepsilon  | 55  | -----                                                        |
| Pp           | 53  | -----                                                        |
| M_RCC299     | 1   | -----                                                        |
| Vcfn         | 51  | -----                                                        |
| Cre          | 52  | -----                                                        |
| At_Bkapa     | 51  | -----                                                        |
| Hs_PPP2R5C   | 38  | -----                                                        |
| Dr_gppp2r5cb | 36  | -----                                                        |
| Hs_Bdelta    | 59  | -----                                                        |
| Sc_RTS1      | 118 | KKTSSRKGQEQSKQSQQPSQSQKQGSSSSSAAIMNPTPVLTVTKDDKSTSGEDHAHPTLL |
| Kl           | 112 | -----TPSVNITKADSNAVG----KPTLI                                |
| Eg           | 105 | -----YPTMI                                                   |
| Sp_par1      | 59  | -----TPVKH                                                   |
| Mo           | 111 | -----TPVRH                                                   |
| Nc           | 109 | -----TPVRH                                                   |

|              |     |                                                               |
|--------------|-----|---------------------------------------------------------------|
| At_Btheta    | 50  | -----                                                         |
| Al           | 53  | -----                                                         |
| Cr           | 53  | -----                                                         |
| Es           | 54  | -----                                                         |
| At_Beta      | 62  | -----                                                         |
| Csi          | 60  | -----                                                         |
| Pv           | 60  | -----                                                         |
| Cs           | 66  | -----                                                         |
| Sl           | 48  | -----                                                         |
| Vv           | 64  | -----                                                         |
| Os           | 63  | -----                                                         |
| Zm           | 59  | -----                                                         |
| Gm           | 64  | -----                                                         |
| Cmsm         | 65  | -----                                                         |
| At_Bzeta     | 64  | -----                                                         |
| At_Bgamma    | 62  | -----                                                         |
| At_Bdelta    | 48  | -----                                                         |
| Smo          | 29  | -----                                                         |
| At_Balpha    | 52  | -----                                                         |
| At_Bbeta     | 53  | -----                                                         |
| At_Bepsilon  | 55  | -----                                                         |
| Pp           | 53  | -----                                                         |
| M_RCC299     | 1   | -----                                                         |
| Vcfn         | 51  | -----                                                         |
| Cre          | 52  | -----                                                         |
| At_Bkapa     | 51  | -----                                                         |
| Hs_PPP2R5C   | 38  | -----NSLVAVPSTVSAK-----                                       |
| Dr_gppp2r5cb | 36  | -----GGNSVPPATQLLK-----                                       |
| Hs_Bdelta    | 59  | -----PSNSTPPPTQLSK-----                                       |
| Sc_RTS1      | 178 | GAVSAVPSSPISNASGTAVSSDVENGNSNNNNMNINTSNTQDANHASSQSIDI PRSSHSF |
| Kl           | 132 | GAAAQVT PPPTS-----PKAQPASLNT PSSATGSTTVLKDSQRSPTSIEI PRSSHSF  |
| Eg           | 110 | --AAAVSPGSTS-----GPPSPKEAEAASPNGIDI PRSSHSF                   |
| Sp_par1      | 64  | -----SGKKVPIDTTP-----                                         |
| Mo           | 116 | GQLPPTVIIISPSG-----APHVPPPGAAETMPHDLAPPKAGQNS                 |
| Nc           | 114 | GTLPPTVIIISPS-----APHVPPPGAAETMPHDLAPPKAGQKS                  |

|              |     |                                                     |
|--------------|-----|-----------------------------------------------------|
| At_Btheta    | 50  | -----SADSGFKEGNLKGNGNG-----FTPYEALPGFKD             |
| Al           | 53  | -----AADSGFKDGNLKGNGNG-----FTPYEALPGFKD             |
| Cr           | 53  | -----AADSGFKDGNLKGNGTG-----FSPYEALPSFKD             |
| Es           | 54  | -----SPSDSGFRDGNLKGNGNG-----FTPYEALPSFKD            |
| At_Beta      | 62  | -----AADSGFKDGNLKSSGNNNNNN-----NGVFTPYEALPSFKD      |
| Csi          | 60  | -----ASDAVQDGNKIQLGMNSKLN-----NLVLSYDTLPALKD        |
| Pv           | 60  | -----LLPKVVNDNVHNSPNN-----GNLGSYEALPIFRD            |
| Cs           | 66  | -----QNHGTKANKGGNAKLN-----IPTSSYEPLPGFRE            |
| Sl           | 48  | -----TGDKFVRDGLKLN-----LVAASYDALPSFRD               |
| Vv           | 64  | -----NNLGSKIPQGGNSKVNGNY-----MTPNTEALPAFRD          |
| Os           | 63  | -----MHVNA-----NSRVNGNS-----VQPTVELLPSFKD           |
| Zm           | 59  | -----VIP-----NPVMNGAV-----VYHSNEPLPAFKD             |
| Gm           | 64  | -----LNHGDRIVQAMNSKLNLN-----FPVMAYEALPSFRD          |
| Cmsm         | 65  | -----LNHGSKPSQGLNSKSN-----SQVSYEALPGFKD             |
| At_Bzeta     | 64  | -----LAPNSMSSNRNTNQGGKPLGGDAVVQAGPFPSGGVYEALPSFRD   |
| At_Bgamma    | 62  | -----IAPSTSSNR--TNQVN-----GVYEALPSFRD               |
| At_Bdelta    | 48  | -----DTSLDCVS-----SFDVLPFRD                         |
| Smo          | 29  | -----LTNFEPLPLFRD                                   |
| At_Balpha    | 52  | -----SPNSMAAATQPPMYS-----VEPLPLFRD                  |
| At_Bbeta     | 53  | -----SP-SPVTATPPPPLGS-----VEPLPLFRD                 |
| At_Bepsilon  | 55  | -----QTTAQSPSQTPNHPMFTTT-----PILEVLPLFRD            |
| Pp           | 53  | -----AAAAVHPVKGFGAVVKQPT-----PSFETLPSFRD            |
| M_RCC299     | 1   | -----SFRD                                           |
| Vcfn         | 51  | -----PPLPVINEQTLQYYAEP-----LPTFRD                   |
| Cre          | 52  | -----PPLPAINEQTLQYYAEP-----LPSFRD                   |
| At_Bkapa     | 51  | -----GKRMSAVFPASVVAG-----IEPLVPFKD                  |
| Hs_PPP2R5C   | 51  | -----IKVPVSPQIVKKDKRQNSSRFASAN-----NRELQKLPFLK      |
| Dr_gppp2r5cb | 49  | -----GKQSGSQTPVKKEKRPNSSRFSLSN-----NRELQKLPFLK      |
| Hs_Bdelta    | 72  | -----IKYSGGPQIVKKERRQSSRFNLSK-----NRELQKLPALK       |
| Sc_RTS1      | 238 | ERLPTPTKLNPD--DLELIKTPQRHSSSRFEP--YTPLTKLPNFE       |
| Kl           | 184 | ERLPTPTKLNADS--DLEMIKTPQRHSSSRFEP--YTQIVKLPFE       |
| Eg           | 145 | ERLPTPTKLNPD--DLELIKTPQRHSSSRFEP--YTQISKLPFGD       |
| Sp_par1      | 75  | -----TPRDEILLENVRTVRKQRSSLYHISE-----NRNLVRLPSFTD    |
| Mo           | 155 | LMFDRLQQTPKD--VPEGLRTPKRQHSSRFDISA-----HRELEKLPGFHE |
| Nc           | 152 | LMFDRLHQTPKD--VLEGLRTPKRQNSSRFDISA-----HRELEKLPGFHE |

|              |     |                                                                |
|--------------|-----|----------------------------------------------------------------|
| At_Btheta    | 79  | VPNAEKQNLFVRKLSLCCVVFDFSD--PTKNVKEKDIKQTLLELVDYV--ASP-NGKFSETV |
| Al           | 82  | VPNAEKQNLFVKKLSLCCVTFDFSD--PTKNVKEKDIKQTLLELVDYV--ASP-NGKFSETV |
| Cr           | 82  | VPNAEKQNLCLRKLNLCCLVDFSD--PTKNVKEKDIKQTLLELVDYV--ASP-GGKFSEMA  |
| Es           | 84  | VPNAEKQNLFLKLNLCVVFDFSD--PTKNVKEKDIKQTLLELVDYV--ASA-NGKFSETV   |
| At_Beta      | 100 | VPNTEKQNLFIKLNLCRVDFD--PTKNIKEKDIKQTLLELVDYV--NSP-NGKFSEVG     |
| Csi          | 96  | VPSAEKQNLFIKLNLCVVFDFD--PTKNLKEKDIKQMLLELVDYV--TSA-NGKFNETV    |
| Pv           | 91  | VPSEKPTLFFVKLRMCCVVFDFD--PAKHLKEKDIKQTLVELVDYV--TSA-NAKFAENV   |
| Cs           | 97  | VPSEKQNLFVKKLNLCFLDFD--PTKHLKEKDIKQTLLELVDYV--TSV-NSKFTETV     |
| Sl           | 78  | VPNAEKQNLFIRKLNCCVLFDFD--PTKNLKEKDIKQTLLELVEYV--TSA-NVKFTEVV   |
| Vv           | 97  | VPSEKQNLFIGKLNLCVVFDFD--PTKNIKEKDIKQTLLELVDYV--TSA-SGKFTETV    |
| Os           | 90  | VPNTEKNNLFVKKLNLCATDFD--PTKSVEKDIKQTLLELVDYV--TASA-NGKFPETI    |
| Zm           | 83  | VPMEKQNLFVKKVSLCCAVYDFD--PTKNLKEKDIKQTLMELELVDYV--ASA-NGKFSEVV |
| Gm           | 98  | VPNEKQNLFIRKLQCCVLFDFD--PTKNIKEKDIKQTLVELVDYV--SSA-NGKFTDM     |
| Cmsm         | 96  | VPNSEKQSLFIKLNLCVVFDFD--PSKNLKEKDIKQTLLELVDYV--ASA-NGKLSENV    |
| At_Bzeta     | 109 | VPISEKPNLFIGKLSMCCVVFDFD--PSKNLKEKDIKQTLLELVDYV--ASV-GFKFNQVS  |
| At_Bgamma    | 88  | VPTSEKPNLFIKLSMCCVVFDFD--PSKNLREKDIKQTLLELVDYV--ATV-STKLSDAA   |
| At_Bdelta    | 66  | VSISEKQELFLKLRCCLVDFDVAEPQNFKEKDIKQTLLELVDYV--ISSGNGKFPESV     |
| Smo          | 41  | VPSEKQSLFVKKLRLCCVDFD--PSKHTREKDIKQTLLELVDYV--TSG-SGKFTENV     |
| At_Balpha    | 78  | VSVSERQSLFLRKLQCCVDFD--TLKNAREKDIKQTLLELVDYV--TQSG-AGKLFTEVC   |
| At_Bbeta     | 78  | VPVSERQTLFLRKLQCCVDFD--TIKNAREKDIKQTLLELVDYV--TQSG-AGKLFTEVC   |
| At_Bepsilon  | 85  | VSSDRPLLFMKLAHMCSCDFD--TLIMPREKDIKQTLLELVDYV--TSS-SGKVNETM     |
| Pp           | 83  | VPTSQRQNLFVRKLAICCRTDFD--PTMDVKEKDIKQMLLELVDYV--TSG-SGKFTETV   |
| M_RCC299     | 5   | VVASERQNLFIKQLCSYTFDFD--ATANVREKDIKQTLLELVDYV--NQG-QGKFTETV    |
| Vcfn         | 75  | VSPAQKQYLFVQKLRHCSFGDFD--PTKHVREKDIKQTLLELVDYV--ANS-GKFTETV    |
| Cre          | 76  | VSPAQKQYLFVQKLRHCSFGDFD--PTKHVREKDIKQTLLELVDYV--ANS-GKFTETV    |
| At_Bkapa     | 76  | VPSSEKLNLFVSKVSLCCVTFDFD--PGKNSIEKDIKQTLLELVDYV--ASG-SVKFTEPA  |
| Hs_PPP2R5C   | 88  | VPPAQEKLFVQKLRQCCVDFDSD--PLSDLKWKVKRAALSEMVEYITHN-RNVITEPI     |
| Dr_gppp2r5cb | 86  | VPPAQEKLFVQKLRQCCVDFDSD--PLSDLKWKVKRAALSEMVEYITHN-RNVITEPI     |
| Hs_Bdelta    | 109 | SPQEREELFIQKLRQCCVDFDSD--PLSDLKWKVKRAGLNEMVEYITHS-RDVVTEAI     |
| Sc_RTS1      | 283 | VSPERIPLFIKLVQCNMDFD--DPSFDIQGKEIKRSTLDELIEFIVTN-RFTYTEEM      |
| Kl           | 229 | VLPEEQIPLFITKVDQCNMDFD--DPSFDIQGKEIKRVTLQELIEFIVTN-RFTYTEEM    |
| Eg           | 190 | VPPEEQISLFIKLVQCNMDFD--DPSFDIHGKEIKRITLQELIEFIVTN-RFTYTEEM     |
| Sp_par1      | 113 | VPVKNWHSLEKLEQCCVDFD--DPSDLYGKEIKREALQDLIDLISVR-KEAIDESL       |
| Mo           | 199 | VPPQRQDLFMQKLDQCNVDFD--DAAGDIKPKKIKRLALHELVDYV--ANN-RQVITEPM   |
| Nc           | 196 | VAPNHRQDLFMKKLEQCNVDFD--DASADMKSKEIKRLALHELVDYV--ANN-RQVITEPM  |

|              |     |                                                                        |
|--------------|-----|------------------------------------------------------------------------|
| At_Btheta    | 137 | IQEIVRMVSVNIFRTLNPQPRENKVIDA---LDLEEEEP SMDPTWPHLQIVYEILLRLTA          |
| Al           | 140 | IQEIVRMVSVNIFRTLNPQPRENKVIDA---LDLEEEEP SMDPTWPHLQIVYEILLRLTA          |
| Cr           | 140 | IQEIVRMVSVNIFRTLNPQPRENKVIDA---LDLEEEEP SMDPAWPHLQIVYEILLRLTA          |
| Es           | 142 | IQEIVRMVSVNIFRTLNPQPRENKVIDA---LDLEEEEP SMDPAWPHLQIVYEILLRLTA          |
| At_Beta      | 158 | IQEIVRMVSVNIFRTLNPQPRENKVIDA---LDLEEEEP SMDLAWPHLQIVYELFLRFVA          |
| Csi          | 154 | MQEIVKVMVSNLFRLLPQPRENKVIDG---VDLEEEEPAMDPAWPHLQIVYEFLLRFVA            |
| Pv           | 149 | MQEIVKVMVSNLFRLLPQPRENKVIDG---VDVEEEEP SMDPAWPHLQIVYELFLRFVA           |
| Cs           | 155 | IQEIVKVMVSNLFRLLPQPRENKVIDG---FDLEEEEP SMDPAWPHLQIVYEFLLRFVA           |
| Sl           | 136 | MQEIVKVMVSNLFRLLPQPRENKVIDA---FDVEEDEFAMPDPSWPHLQIVYEFLLRFVA           |
| Vv           | 156 | MQEIVKVMVSNLFRLLPQPRENKVIDG---FDLEEEEP SIDPAWPHLQIVYEFLLRFVA           |
| Os           | 148 | MQEIVKVMVSNLFRLLPQPRENKVIDA---FDVDEEFPVMDPAWPHLQIVYELFLRFVQ            |
| Zm           | 141 | MQEIVKVMVSNLFRLLPQPRENKVIDG---VDLEEDEF LMDPAWPHLQIVYEFLLRFVA           |
| Gm           | 156 | MQEIVKVMVSNLFRLLPQPRENKVIDA---FDVDEEEP SMDPAWPHLQIVYEFLLRFVM           |
| Cmsm         | 154 | IQEIVKVMVSNLFRLLPQPRENKVIDA---FDLEEEEP SMDPAWPHLQIVYEFLLRFVA           |
| At_Bzeta     | 167 | MQEIVKVMVSNLFRLLPQPRENKVIDA---HDMDEEFP SLEPAWPHVQVYEFLLRFVA            |
| At_Bgamma    | 146 | MQEIVKVMVSNLFRLLPQPRENKVIDA---LDVDEEFP ALEPAWPHLQIVYEFLLRFVA           |
| At_Bdelta    | 126 | IQEIVKVMVSNLFRLLPQPRENKVIDA---LDLEEEEP SINSWPHLQIVYEFLLRFVA            |
| Smo          | 99  | IQEIVKVMVSNLFRLLPQPRENKVIDA---SFDDEEFPVMDPAWPHLQIVYEFLLRFVW            |
| At_Balpha    | 136 | QEMIVKVMVSNLFRLLPQPRENKVIDA---ADLEEEEP YLEPSWPHLQIVYEFLLRFVIV          |
| At_Bbeta     | 136 | QEMIVKVMVSNLFRLLPQPRENKVIDA---ADPEEEEP YLEPSWPHLQIVYEFLLRFVV           |
| At_Bepsilon  | 143 | QSELIRVMVSNLFRLLPQPRENKVIDA---GNDPEEEEP YLEPWSWPHLQIVYEFLLRFVV         |
| Pp           | 141 | FEDITRMLAANLFRLLPQPRENKVIDA---SSHENKGESEFD AEEEEPTMEPAWPHLQIVYEFLLRFVW |
| M_RCC299     | 63  | FEDISYMLAANLFRLLPQPRENKVIDA---VRSHGDAEG-NYDAEEEEPSLDPAWPHLQIVYEFLLRFVW |
| Vcfn         | 133 | SEDIYMLAANLFRLLPQPRENKVIDA---VRSHGDAEG-NYDAEEEEPSLDPAWPHLQIVYEFLLRFVW  |
| Cre          | 134 | SEDIYMLAANLFRLLPQPRENKVIDA---VRSHGDAEG-NYDAEEEEPSLDPAWPHLQIVYEFLLRFVW  |
| At_Bkapa     | 134 | ILAMCRMCVAVNLFRLPPNYRSSSGGEN-----DDDEPMPDPAWPHLQIVYDLLLKFTIT           |
| Hs_PPP2R5C   | 147 | YPEVVMHFAVNMFRLLPSSNPTGAEFD-----PEDEPTLEAAWPHLQIVYEFLLRFTE             |
| Dr_gppp2r5cb | 145 | YPEVVMHFAVNMFRLLPSSNPTGAEFD-----PEDEPTLEAAWPHLQIVYEFLLRFTE             |
| Hs_Bdelta    | 168 | YPEAVTMFVSNLFRLLPSSNPTGAEFD-----PEDEPTLEAAWPHLQIVYEFLLRFTE             |
| Sc_RTS1      | 341 | YAHVVMHFAVNMFRLLPSSNPTGAEFD-----PDEDEPVNELAWPHMQAVYEFLLRFVE            |
| Kl           | 287 | YEHVVMHFAVNMFRLLPSSNPTGAEFD-----PDEDEPVNELAWPHMQAVYEFLLRFVE            |
| Eg           | 248 | YGHVVMHFAVNMFRLLPSSNPTGAEFD-----PDEDEPVNELAWPHMQAVYEFLLRFVE            |
| Sp_par1      | 171 | YPSVVMHFAVNMFRLLPSSNPTGAEFD-----LEEDEPALEVAWPHLQIVYDFFLLRFTE           |
| Mo           | 257 | YPKVVMHFAVNMFRLLPSSNPTGAEFD-----PEDEPVLEVAWPHLQIVYEFLLRFTE             |
| Nc           | 254 | YPRVVMHFAVNMFRLLPSSNPTGAEFD-----PEDEPVLEVAWPHLQIVYEFLLRFTE             |

|              |     |                                                             |
|--------------|-----|-------------------------------------------------------------|
| At_Btheta    | 194 | SPETDTKLAKKYIDQSFVSRLLDLFDSQPRERDCLKTVLHRIYKGFVHRPFIKRSINN  |
| Al           | 197 | SPETDTKLAKKYIDQSFVSRLLDLFDSQPRERDCLKTVLHRIYKGFVHRPFIKRSINN  |
| Cr           | 197 | SPETDTKLAKKYIDQSFVSRLLDLFDSQPRERDCLKTVLHRIYKGFVHRPFIKRSINN  |
| Es           | 199 | SPETDTKLAKKYIDQSFVSRLLDLFDSQPRERDCLKTVLHRIYKGFVHRPFIKRSINN  |
| At_Beta      | 215 | SPETDTKLAKKYIDQSFVSRLLDLFDSQPRERDCLKTILHRIYKGFVHRPFIKRSINN  |
| Csi          | 211 | SPETDAKLAKRYIDQSFVSRLLDLFDSQPRERDCLKTILHRIYKGFVHRPFIKRSINN  |
| Pv           | 206 | SPETDAKLAKRYIDQSFVSRLLDLFDSQPRERDCLKTILHRIYKGFVHRPFIKRSINN  |
| Cs           | 212 | SPETDAKLAKRYIDHSFVSRLLDLFDSQPRERDCLKTILHRIYKGFVHRPFIKRSINN  |
| Sl           | 192 | SPETDAKLAKRYIDHSFVSRLLDLFDSQPRERDCLKTILHRIYKGFVHRPFIKRSINN  |
| Vv           | 212 | SPETDAKLAKRYIDHSFVSRLLDLFDSQPRERDCLKTILHRIYKGFVHRPFIKRSINN  |
| Os           | 204 | SPETDAKLAKRYIDHSFVSRLLDLFDSQPRERDCLKTILHRIYKGFVHRPFIKRSINN  |
| Zm           | 198 | SPETDAKLAKRYIDHSFVSRLLDLFDSQPRERDCLKTILHRIYKGFVHRPFIKRSINN  |
| Gm           | 213 | SPETDAKLAKRYIDHSFVSRLLDLFDSQPRERDCLKTILHRIYKGFVHRPFIKRSINN  |
| Cmsm         | 211 | SPETDAKLAKRYIDHSFVSRLLDLFDSQPRERDCLKTILHRIYKGFVHRPFIKRSINN  |
| At_Bzeta     | 224 | SPETDAKLAKRYIDHSFVSRLLDLFDSQPRERDCLKTILHRIYKGFVHRPFIKRSINN  |
| At_Bgamma    | 203 | SPETDAKLAKRYIDHSFVSRLLDLFDSQPRERDCLKTILHRIYKGFVHRPFIKRSINN  |
| At_Bdelta    | 182 | SPETDAKLAKRYIDHSFVSRLLDLFDSQPRERDCLKTILHRIYKGFVHRPFIKRSINN  |
| Smo          | 156 | SPETDAKLAKRYIDHSFVSRLLDLFDSQPRERDCLKTILHRIYKGFVHRPFIKRSINN  |
| At_Balpha    | 193 | SPETDAKLAKRYIDHSFVSRLLDLFDSQPRERDCLKTILHRIYKGFVHRPFIKRSINN  |
| At_Bbeta     | 193 | SPETDAKLAKRYIDHSFVSRLLDLFDSQPRERDCLKTILHRIYKGFVHRPFIKRSINN  |
| At_Bepsilon  | 202 | SPETDAKLAKRYIDHSFVSRLLDLFDSQPRERDCLKTILHRIYKGFVHRPFIKRSINN  |
| Pp           | 198 | SPETDAKLAKRYIDHSFVSRLLDLFDSQPRERDCLKTILHRIYKGFVHRPFIKRSINN  |
| M_RCC299     | 123 | SPETDAKLAKRYIDHSFVSRLLDLFDSQPRERDCLKTILHRIYKGFVHRPFIKRSINN  |
| Vcfn         | 190 | SPETDAKLAKRYIDHSFVSRLLDLFDSQPRERDCLKTILHRIYKGFVHRPFIKRSINN  |
| Cre          | 191 | SPETDAKLAKRYIDHSFVSRLLDLFDSQPRERDCLKTILHRIYKGFVHRPFIKRSINN  |
| At_Bkapa     | 188 | SPETDAKLAKRYIDHSFVSRLLDLFDSQPRERDCLKTILHRIYKGFVHRPFIKRSINN  |
| Hs_PPP2R5C   | 202 | SPDFQPNIAKKYIDQKQFVLRLLDLFDSQPRERDCLKTILHRIYKGFVHRPFIKRSINN |
| Dr_gppp2r5cb | 200 | SPDFQPNIAKKYIDQKQFVLRLLDLFDSQPRERDCLKTILHRIYKGFVHRPFIKRSINN |
| Hs_Bdelta    | 223 | SPDFQPNIAKKYIDQKQFVLRLLDLFDSQPRERDCLKTILHRIYKGFVHRPFIKRSINN |
| Sc_RTS1      | 396 | SPDFNHQIAKQYIDQKQFVLRLLDLFDSQPRERDCLKTILHRIYKGFVHRPFIKRSINN |
| Kl           | 342 | SPDFNHQIAKQYIDQKQFVLRLLDLFDSQPRERDCLKTILHRIYKGFVHRPFIKRSINN |
| Eg           | 303 | SPDFNHQIAKQYIDQKQFVLRLLDLFDSQPRERDCLKTILHRIYKGFVHRPFIKRSINN |
| Sp_par1      | 226 | SPDLNLSVAKVYIDQKQFVLRLLDLFDSQPRERDCLKTILHRIYKGFVHRPFIKRSINN |
| Mo           | 312 | SPDFNNTIAKAYIDHSFVLRLLDLFDSQPRERDCLKTILHRIYKGFVHRPFIKRSINN  |
| Nc           | 309 | SPDFNNTIAKAYIDHSFVLRLLDLFDSQPRERDCLKTILHRIYKGFVHRPFIKRSINN  |

|              |     |            |              |           |             |              |             |          |          |
|--------------|-----|------------|--------------|-----------|-------------|--------------|-------------|----------|----------|
| At_Btheta    | 254 | IFYRFVFE   | TEKHNGIAE    | FFLEILGSI | INGFALPLK   | DEHKVFLVRAL  | VPLHKPKSLO  | MYHQO    |          |
| Al           | 257 | IFYRFVFE   | TEKHNGIAE    | FFLEILGSI | INGFALPLK   | DEHKVFLVRAL  | VPLHKPKSLO  | MYHQO    |          |
| Cr           | 257 | IFYRFVFE   | TEKHNGIAE    | FFLEILGSI | INGFALPLKEE | HKVFLVRAL    | VPLHKPKCLO  | MYHQO    |          |
| Es           | 259 | VFYRFVFE   | TEKHNGIAE    | FFLEILGSI | INGFALPLKEE | HKVFLVRAL    | VPLHKPKCLO  | MYHQO    |          |
| At_Beta      | 275 | IFYRFVFE   | TEKHNGIAE    | FFLEILGSI | INGFALPLK   | DEHKVFLVRVLI | PLHKPKCLO   | MYHQO    |          |
| Csi          | 271 | IFYRFIFETE | RHNGIAE      | FFLEILGSI | INGFALPLKEE | HKVFLVRVLI   | PLHKPKSL    | AMYHQO   |          |
| Pv           | 266 | VFFNFIFETE | KHNGIAE      | FFLEILGSI | INGFALPLKEE | HKLFVLRVLI   | PLHKPKCL    | AMYHQO   |          |
| Cs           | 272 | IFYRFIFETE | KHNGIAELLE   | IILGSI    | INGFALPLKEE | HKLFVLRALI   | PLHKPKCL    | AMYHQO   |          |
| Sl           | 252 | IFYRFVFE   | TEKHNGIAELLE | IILGSI    | INGFALPLKEE | HKLFVLRVLI   | PLHKPKCL    | AMYHQO   |          |
| Vv           | 272 | IFYRFIFETE | KHNGIAELLE   | IILGSI    | INGFALPLKEE | HKLFVLRALI   | PLHKPKCL    | PMYHQO   |          |
| Os           | 264 | IFYQFIYETE | KHNGIAELLE   | IILGSI    | INGFALPLKEE | HKLFVLRALI   | PLHKPKCI    | GMYHQO   |          |
| Zm           | 258 | IFYRFIFETE | KHNGIAELLE   | IILGSI    | INGFALPLKEE | HKLFVLRALI   | PLHKPKCV    | SMYHQO   |          |
| Gm           | 273 | IFYRFIFETE | KHNGIAELLE   | IILGSI    | INGFALPLKEE | HKLFVLRALI   | PLHKPKCI    | PMYHQO   |          |
| Cmsm         | 271 | IFYRFVFE   | TEKHNGIAELLE | IILGSI    | INGFALPLKEE | HKLFVLRALI   | PLHKPKCI    | PMYHQO   |          |
| At_Bzeta     | 284 | IFYRFISETE | KHNGIAELLE   | IILGSI    | INGFALPLKEE | HKLFVLRALI   | PLHKPKCSS   | VYHQO    |          |
| At_Bgamma    | 263 | IFYRFIFETE | KHNGIAELLE   | IILGSI    | INGFALPLKEE | HKLFVLRALI   | PLHKPKCAS   | AYHQO    |          |
| At_Bdelta    | 242 | IFYRFIFETE | GKHS         | GIAELLE   | IILGSI      | INGFALPLKEE  | HKLFVLRVLI  | PLHKPKCL | PNYHQO   |
| Smo          | 216 | IFYRFIFETE | KHNGIAEMLE   | IILGSI    | INGFALPLKEE | HKLFVLRAL    | VPLHKPKCV   | AMYHQO   |          |
| At_Balpha    | 253 | IFYRFIYETE | RHSGIGELLE   | IILGSI    | INGFALPMKEE | HKLFVLRALI   | PLHKPKPI    | AMYHQO   |          |
| At_Bbeta     | 253 | IFYRFIYETE | RHSGIGELLE   | IILGSI    | INGFALPMKEE | HKLFVLRVLI   | PLHKPKPI    | VYHQO    |          |
| At_Bepsilon  | 262 | IFYRFIYETE | RCTGIGELLE   | IILGSI    | INGFTVPMRE  | EEHFLVLRVLI  | PLHKPKSG    | ISITYHQO |          |
| Pp           | 258 | IFYRFIFETE | KHNGIAELLE   | IILGSI    | INGFALPLKEE | HKVFLVRALI   | PLHKPKCV    | SMYHQO   |          |
| M_RCC299     | 183 | IFYRFIYETE | RHNGIAELLE   | IILGSI    | INGFALPLKEE | HKVFLVLRALI  | PLHKPKCV    | SMYHQO   |          |
| Vcfn         | 250 | VFYRFIFETE | RHNGIAELLE   | IILGSI    | INGFALPLKEE | HKVFLVLRAL   | MPLHKPKCV   | AMYHQO   |          |
| Cre          | 251 | VFYRFIFETE | RHNGIAELLE   | IILGSI    | INGFALPLKEE | HKVFLVLRAL   | MPLHKPKCV   | AMYHQO   |          |
| At_Bkapa     | 248 | IFYRFVFE   | TEKHS        | GIAELLEIF | SGFALPLKEE  | HKVFLVRVLI   | PLHKPKSV    | GNVYHQO  |          |
| Hs_PPP2R5C   | 262 | IFYRFIYETE | HHNGIAELLE   | IILGSI    | INGFALPLKEE | HKVFLVLRVLI  | PLHKPKSV    | SLSVYHQO |          |
| Dr_gppp2r5cb | 260 | IFYRFIYETE | HHNGIAELLE   | IILGSI    | INGFALPLKEE | HKVFLVLRVLI  | PLHKPKSV    | SLSVYHQO |          |
| Hs_Bdelta    | 283 | IFYRFIYETE | HHNGIAELLE   | IILGSI    | INGFALPLKEE | HKVFLVLRVLI  | PLHKPKSV    | SLSVYHQO |          |
| Sc_RTS1      | 456 | IFLQFIYETE | KFN          | GIAELLEI  | IGSI        | INGFALPLKEE  | HKVFLVRILI  | PLHKVRC  | LSVYHQO  |
| Kl           | 402 | IFLQFIYETE | RFN          | GIAELLEI  | IGSI        | INGFALPLKEE  | HKVFLVRVLI  | PLHKVRC  | LSVYHQO  |
| Eg           | 363 | IFLQFVYETE | RFN          | GIAELLEI  | IGSI        | INGFALPLKEE  | HKVFLVRILI  | PLHKVRC  | LSVYHQO  |
| Sp_par1      | 286 | IFLQFVYENE | QFN          | GIAELLEI  | IGSI        | INGFALPLKEE  | HKVFLVLRVLI | PLHKAK   | SLPLYHQO |
| Mo           | 372 | VFFQFIYETE | RFN          | GIAELLEI  | IGSI        | INGFALPLKEE  | HKVFLVLRVLI | PLHKVRC  | LSVYHQO  |
| Nc           | 369 | VFFQFIYETE | RFN          | GIAELLEI  | IGSI        | INGFALPLKEE  | HKVFLVLRVLI | PLHKVRC  | LSVYHQO  |

|              |     |       |           |            |         |          |            |      |       |       |     |
|--------------|-----|-------|-----------|------------|---------|----------|------------|------|-------|-------|-----|
| At_Btheta    | 314 | LSYCI | TQFVEKDCK | LADTVIRGLL | KSWPVTN | SSKEVMFL | NELEEVLEAT | QPP  | EFQRC | MVP   |     |
| Al           | 317 | LSYCI | TQFVEKDCK | LADTVIRGLL | KSWPVTN | SSKEVMFL | NELEEVLEAT | QPP  | EFQRC | MVP   |     |
| Cr           | 317 | LSYCI | TQFVEKDCK | LADTVIRGLL | KSWPVTN | SSKEVMFL | NELEEVLEAT | QPP  | EFQRC | MVP   |     |
| Es           | 319 | LSYCI | TQFVEKDCK | LADTVIRGLL | KSWPVTN | SSKEVMFL | NELEEVLEAT | QPP  | EFQRC | MVP   |     |
| At_Beta      | 335 | LSYCI | TQFVEKDCK | LADTVIRGLL | KYWPVTN | SSKEVMFL | NELEEVLEAT | QPP  | EFQRC | MVP   |     |
| Csi          | 331 | LSYCI | TQFVEKDCK | LADTVIRGLL | KYWPVTN | SSKEVMFL | NELEEVLEAT | QPP  | EFQRC | MVP   |     |
| Pv           | 326 | LSYCI | TQFVEKDCK | LADTVIRGLL | KYWPVTN | SSKEVMFL | NELEEVLEAT | QPP  | EFQRC | MVP   |     |
| Cs           | 332 | LSYCI | TQFVEKDCK | LADTVIRGLL | KYWPVTN | SSKEVMFL | NELEEVLEAT | QPP  | EFQRC | MVP   |     |
| Sl           | 312 | LYCMT | TQFVEKDCK | LADTVIRGLL | KYWPVTN | SSKEVMFL | NELEEVLEAT | QPP  | EFQRC | MVP   |     |
| Vv           | 332 | LSYCI | TQFVEKDCK | LADTVIRGLL | KYWPVTN | SSKEVMFL | NELEEVLEAT | QPP  | EFQRC | MVP   |     |
| Os           | 324 | LSYCI | TQFVEKDCK | LADTVIRGLL | KYWPVTN | SSKEVMFL | NELEEVLEAT | QPP  | EFQRC | MVP   |     |
| Zm           | 318 | LSYCI | TQFVEKDCK | LADTVIRGLL | KYWPVTN | SSKEVMFL | NELEEVLEAT | QPP  | EFQRC | MVP   |     |
| Gm           | 333 | LSYCI | TQFVEKDCK | LADTVIRGLL | KYWPVTN | SSKEVMFL | NELEEVLEAT | QPP  | EFQRC | MVP   |     |
| Cmsm         | 331 | LSYCI | TQFVEKDCK | LADTVIRGLL | KYWPVTN | SSKEVMFL | NELEEVLEAT | QPP  | EFQRC | MVP   |     |
| At_Bzeta     | 344 | LSYCI | TQFVEKDCK | LADTVIRGLL | KYWPVTN | SSKEVMFL | NELEEVLEAT | QPP  | EFQRC | MVP   |     |
| At_Bgamma    | 323 | LSYCI | TQFVEKDCK | LADTVIRGLL | KYWPVTN | SSKEVMFL | NELEEVLEAT | QPP  | EFQRC | MVP   |     |
| At_Bdelta    | 302 | LSYCI | TQFVEKDCK | LADTVIRGLL | KYWPVTN | SSKEVMFL | NELEEVLEAT | QPP  | EFQRC | MVP   |     |
| Smo          | 276 | LSYCI | TQFVEKDCK | LADTVIRGLL | KYWPVTN | SSKEVMFL | NELEEVLEAT | QPP  | EFQRC | MVP   |     |
| At_Balpha    | 313 | LSYCI | TQFVEKDCK | LADTVIRGLL | KYWPVTN | SSKEVMFL | NELEEVLEAT | QPP  | EFQRC | MVP   |     |
| At_Bbeta     | 313 | LSYCI | TQFVEKDCK | LADTVIRGLL | KYWPVTN | SSKEVMFL | NELEEVLEAT | QPP  | EFQRC | MVP   |     |
| At_Bepsilon  | 322 | LYCVT | TQFVEKDCK | LADTVIRGLL | KYWPVTN | SSKEVMFL | NELEEVLEAT | QPP  | EFQRC | MVP   |     |
| Pp           | 318 | LSYCI | TQFVEKDCK | LADTVIRGLL | KYWPVTN | SSKEVMFL | NELEEVLEAT | QPP  | EFQRC | MVP   |     |
| M_RCC299     | 243 | LSYCI | TQFVEKDCK | LADTVIRGLL | KYWPVTN | SSKEVMFL | NELEEVLEAT | QPP  | EFQRC | MVP   |     |
| Vcfn         | 310 | LYCVT | TQFVEKDCK | LADTVIRGLL | KYWPVTN | SSKEVMFL | NELEEVLEAT | QPP  | EFQRC | MVP   |     |
| Cre          | 311 | LYCVT | TQFVEKDCK | LADTVIRGLL | KYWPVTN | SSKEVMFL | NELEEVLEAT | QPP  | EFQRC | MVP   |     |
| At_Bkapa     | 308 | LSYCI | TQFIDKEPK | LGSVIRGLL  | KYWPVTN | SSKEVMFL | NELEEVLEAT | QPP  | EFQRC | MVP   |     |
| Hs_PPP2R5C   | 322 | LYCVV | QFLEKDS   | TEPVVM     | ALLKYWP | KTHSPKE  | VMFLNELEEV | LEAT | QPP   | EFQRC | MVP |
| Dr_gppp2r5cb | 320 | LYCVV | QFLEKDS   | TEPVVM     | ALLKYWP | KTHSPKE  | VMFLNELEEV | LEAT | QPP   | EFQRC | MVP |
| Hs_Bdelta    | 343 | LYCVV | QFLEKDS   | TEPVVM     | ALLKYWP | KTHSPKE  | VMFLNELEEV | LEAT | QPP   | EFQRC | MVP |
| Sc_RTS1      | 516 | LYCVV | QFLEKDS   | TEPVVM     | ALLKYWP | KTHSPKE  | VMFLNELEEV | LEAT | QPP   | EFQRC | MVP |
| Kl           | 462 | LYCVV | QFLEKDS   | TEPVVM     | ALLKYWP | KTHSPKE  | VMFLNELEEV | LEAT | QPP   | EFQRC | MVP |
| Eg           | 423 | LYCVV | QFLEKDS   | TEPVVM     | ALLKYWP | KTHSPKE  | VMFLNELEEV | LEAT | QPP   | EFQRC | MVP |
| Sp_par1      | 346 | LYCVV | QFLEKDS   | TEPVVM     | ALLKYWP | KTHSPKE  | VMFLNELEEV | LEAT | QPP   | EFQRC | MVP |
| Mo           | 432 | LYCVV | QFLEKDS   | TEPVVM     | ALLKYWP | KTHSPKE  | VMFLNELEEV | LEAT | QPP   | EFQRC | MVP |
| Nc           | 412 | LYCVV | QFLEKDS   | TEPVVM     | ALLKYWP | KTHSPKE  | VMFLNELEEV | LEAT | QPP   | EFQRC | MVP |

|              |     |                                                          |          |
|--------------|-----|----------------------------------------------------------|----------|
| At_Btheta    | 374 | LFRQVARCLNSLHFQVAERALFLWNNDHIEENLIMQNRKVILPIIFPALERN     | -----    |
| Al           | 377 | LFRQVARCLNSLHFQVAERALFLWNNDHIEENLIMQNRKVILPIIFPALERN     | -----    |
| Cr           | 377 | LFRQVARCLNSLHFQVAERALFLWNNDHIEENLIMQNRKVILPIIFPALERN     | -----    |
| Es           | 379 | LFRQVARCLNSLHFQVAERALFLWNNDHIESLIMQNRKVILPIIFPALERN      | -----    |
| At_Beta      | 395 | LFRQIARCLNSLHFQVAERALFLWNNHIEENLIMQNRKVILPIIFPALERNA     | -----    |
| Csi          | 391 | LFRQIARCLNSLHFQVAERALFLWNNDHIEENLIQNRKVILPIIFPALEKNA     | -----    |
| Pv           | 386 | LFRRIARCLNSPHFQVAERALFLWNNDHIVNLIKQNRKVILPIIFPALERNA     | -----    |
| Cs           | 392 | LFRQIARCLNSSHFQVAERALFLWNNDHIEENLIKENRQNRKVILPIIFPALEKNA | -----    |
| Sl           | 372 | LFRRIACQLTSLHFQVAERALFLWNNDHIEENLIKQHRKVILPIIFPALERNA    | -----    |
| Vv           | 392 | LFRQIARCLNSSHFQVAERALFLWNNGHIEENLIKQNRGTILPIIFPALEKNA    | -----    |
| Os           | 384 | LFRQIAHCLNSSHFQVAERALFLWNNDHIEENLIKQNSRVILPIIFPALERNA    | -----    |
| Zm           | 378 | LFRQISRSMSNFHFQVAERALFLWNNDHIEETLIKQNYKVILPIIFPALERNS    | -----    |
| Gm           | 393 | LFRQISCCLSSSHFQVAERALFLWNNDHIEETLIKQNHKILPIIFPALEHNA     | -----    |
| Cmsm         | 391 | LFRQIGRCLSSSHFQVAERTLFLWNNHIEENLIKQNRKVILPIIFPALERNS     | -----    |
| At_Bzeta     | 404 | LSRQIARCLNSSHFQVAERALFLWNNDHIRNLITQNRHKVIMPIIFPALERN     | -----    |
| At_Bgamma    | 383 | LFRQIARCLNSSHFQVAERALFLWNNDHIRNLITQNRHKVIMPIIFPALERN     | -----    |
| At_Bdelta    | 362 | LSRQIARCLSSSHFQVAERALFLWNNHVTNLVQRNSRIILPIIFPALEKNG      | -----    |
| Smo          | 336 | LFRQIARCLNSSHFQVAERALFLWNNHVVSLVAQNRQTIPLPIIFSALEMNN     | -----    |
| At_Balpha    | 373 | LFRQIARCLSSSNFQVAERALFLWNNHVVGLIAQNRGVILPIIFASLEKNI      | -----    |
| At_Bbeta     | 373 | LFRQIGRCLTSSSHFQVAERALFLWNNHIVGLIAQNRSVILPIIFPALEKNI     | -----    |
| At_Bepsilon  | 382 | LFRQIGKCLNSAHFQVAERALFLWNNHIVGLIAQNRQDVIFPIIFPALERNM     | -----    |
| Pp           | 378 | LFRQIGRCLNSSHFQVAERALFLWNNHIVSLVAQNRQVILPIIFPALERN       | -----    |
| M_RCC299     | 303 | LFRQISACINSSHFQVAERALFLWNNYIVNLVAQNRHVLVPCFGALERNA       | -----    |
| Vcfn         | 370 | LFRQIAKCLNSQHFQVAERSLFLWNNYIVNLVAQNRHQLLPIIFPALEENT      | -----    |
| Cre          | 371 | LFRQIAKCLNSQHFQVAERSLFLWNNYIVNLVAQNRHQLLPIIFPALEENT      | -----    |
| At_Bkapa     | 368 | LFLRIACCVTSSSHFQVSERALFLWNNQIVNLIGHNRQAILPIMFTALEKNA     | -----    |
| Hs_PPP2R5C   | 382 | LFRQIAKCVSSPHFQVAERALYWNNEYSIMSLISDNAAKILPIMFPSTLYRNS    | -----    |
| Dr_gppp2r5cb | 380 | LFRQIAKCVSSPHFQVAERALYWNNEYSIMSLISDNAAKILPIMFPSTLYRNS    | -----    |
| Hs_Bdelta    | 403 | LFRQIAKCVSSPHFQVAERALYWNNEYSIMSLISDNAAARVLPIMFPALYRNS    | -----    |
| Sc_RTS1      | 576 | LFRQIAKCISSPHFQVAEKVLSYWNNEYSFLNLCIENAEVILPIIFPALYELT    | SQLELD-- |
| Kl           | 522 | LFRQIAKCISSPHFQVAEKVLSYWNNEYSFLNLCIENAEVILPIIFPALYELT    | SQLDKNDP |
| Eg           | 483 | LFRQIAKCISSPHFQVAEKVLSYWNNEYSFLNLCIENAEVILPIIFPALYELT    | SQLDLDS- |
| Sp_par1      | 406 | LFRQIAKCISSPHFQVAERALYFNNDFVHLEENVDIILPIIFPALFEIS        | -----    |
| Mo           | 492 | LFRQIAKSVASPHFQVAERALYFNNDFVHLEENVDIILPIMFAPLYENS        | -----    |
| Nc           | 454 | LFRQIAKSVASPHFQVAERALYFNNDFVHLEENVDIILPIMFAPLYENS        | -----    |

|              |     |                                                               |  |
|--------------|-----|---------------------------------------------------------------|--|
| At_Btheta    | 426 | -----QKHWNQAVHSLTLNVQKIFNDIDAELEKDCLAKFREDES                  |  |
| Al           | 429 | -----QKHWNQAVHSLTLNVQKIFNDIDAELEKDCLAKFREDES                  |  |
| Cr           | 429 | -----QKHWNQAVHSLTLNVQKIFNDIDAELEKDCLGKFREDES                  |  |
| Es           | 431 | -----QKHWNQAVHSLTLNVQKIFNDIDPEEFKECLAKFRENEA                  |  |
| At_Beta      | 447 | -----QKHWNQAVHSLTLNVRKIFHDLDPLEKDCLAKFREDES                   |  |
| Csi          | 443 | -----RNHWNQAVHSLTLNVRKIFFDLDPLEKDCLAKFREYES                   |  |
| Pv           | 438 | -----RSHWNQAVHSLTLNVRKIFNDVDADLSKECLQKFEEDES                  |  |
| Cs           | 444 | -----RSHWNQAVHSLTLNVRKIFYDLDPDLLEKDCLVKQFEEDEL                |  |
| Sl           | 424 | -----RNHWNQAVHSLSLNVRKIFYDLDPLEKDCLVHNFQFEEDEL                |  |
| Vv           | 444 | -----RNHWNQAVHGLTLNVRKIFFDLDPLEKDCLVKQFEEDES                  |  |
| Os           | 436 | -----NGHWNQAVQSLTLNVRKIFSDHDVGVYDECQRKYEDDKA                  |  |
| Zm           | 430 | -----RDHWNQAVRSLTLNVRKIFSDHDSTFECEVQRFSDEEL                   |  |
| Gm           | 445 | -----RNHWNQAVQSLTLNVRKIFVDTDPEFYECEMIKVRNEBA                  |  |
| Cmsm         | 443 | -----RNHWNQAVQNLTLNVRKIFSDADPELFDECLLKFQEEET                  |  |
| At_Bzeta     | 456 | -----RGHWNQAVQSLTLNVRKVLCELDQVLFDECLAKFQVEEV                  |  |
| At_Bgamma    | 435 | -----RGHWNQAVQSLTLNVRKVMMAETDQILFDECLAKFQVEEA                 |  |
| At_Bdelta    | 414 | -----SSHWNQAVKNLTENLVKVLSDTNPDLFECECHKFQVEEQ                  |  |
| Smo          | 388 | -----RNHWNQAVHGLTLNVRKMFSEMDPELFQECQRKFQVEE                   |  |
| At_Balpha    | 425 | -----ESHWNQAVHGLSANIKRMFMEMDPELFQECQQQYEEKQA                  |  |
| At_Bbeta     | 425 | -----QSHWNQAVHGLTNIKKFMEMDPELFQECQQQYEEKQA                    |  |
| At_Bepsilon  | 434 | -----KSHWNQAVHGLSENVRMFMEMDPELFQECQKQYELNEA                   |  |
| Pp           | 430 | -----RSHWNQAVHGLTLNVRKMFVEMDQELFQECQRKYEEDEA                  |  |
| M_RCC299     | 355 | -----RSHWNQAVGGLTVNVRKMLMEMDQQLYECQRNWEDEEL                   |  |
| Vcfn         | 422 | -----NSHWNQAVHGLTLNVRKMFQELDEQLYECQRKYEEDEA                   |  |
| Cre          | 423 | -----NSHWNQAVHGLTLNVRKMFQELDEALYECQRKYEEDEA                   |  |
| At_Bkapa     | 420 | -----QNHWNQAVSLNLTNVRKMFCEMDEALFMSCHARFKDEEA                  |  |
| Hs_PPP2R5C   | 434 | -----KTHWNKTIHGLIYNALKLFMEMNQKLFDDCTQQFKAEKL                  |  |
| Dr_gppp2r5cb | 432 | -----KTHWNKTIHGLIYNALKLFMEMNQKLFDDCTQQFRAEKN                  |  |
| Hs_Bdelta    | 455 | -----KSHWNKTIHGLIYNALKLFMEMNQKLFDDCTQQYKAEKQ                  |  |
| Sc_RTS1      | 634 | -TANGEDSISDPYMLVEQAINSGSWNRATHAMAFKALKIFLETNPVLYENCNALYLSVSK  |  |
| Kl           | 582 | LSLEDGDNGEDPYMLVEQAINSGSWNRATHAMAFKALKIFLETNPNVLYENCNALYISSLK |  |
| Eg           | 542 | QTDEEGNPNQDPYMLVEQAINSGSWNRATHAMAFKALKIFLETNPVLYENCNALYSSLK   |  |
| Sp_par1      | 458 | -----KSHWNRVTHSMVCNVLKLFMDINPSLFDEVDAAEYSESR                  |  |
| Mo           | 544 | -----KSHWNRTIHGMVYNAMKLFMEINPOLFDDCSHEYTEQQN                  |  |
| Nc           | 506 | -----KSHWNRTIHGMVYNAMKLFMEINPOLFDDCSHEYTEQQN                  |  |

At\_Btheta 465 KEAEIGAKREATWKRLEEIGN-----  
 Al 468 KEAEIDAKRESTWKRLEEIGN-----  
 Cr 468 KEAEIGAKREATWKRLEEIGN-----  
 Es 470 KEAEVEAKREATWKRLEEIGM-----  
 At\_Beta 486 KAAETEAKREATWKRLEELGV-----  
 Csi 482 KEGETEAREATWKRLEELAEAGNV-----PINKLV  
 Pv 477 KESEVKGAGREATWKRLEELAMKKA-----ASGEAV  
 Cs 483 KENELKARREATWKRLEELAAKKA-----ASNEAV  
 Sl 463 KEDEIKSKREATWKRLEELAAKNT-----TSNEAV  
 Vv 483 KEDEIKAKREAAWKLEEMAARV-----ASNEAV  
 Os 475 KEKETKLEQEVAVWKRLEEMASAKA-----TSGAAV  
 Zm 469 KQAEVSDSKRDAMWKRLEEMGASKP-----GGNHPL  
 Gm 484 QEKDMKSKREARWKRLEEMGGMKA-----TTNEAV  
 Cmsm 482 QEKDMKSKREAKWKRLEELAAKKA-----ASIEAV  
 At\_Bzeta 495 NKTEVKAARETWRLEDLATSKTV-----VTNEAV  
 At\_Bgamma 474 NETEVVAKREATWKRLEELAAKSI-----VSNEAV  
 At\_Bdelta 453 KAEITKKKNGETWRLEELIVASMAK-----  
 Smo 427 KSKGTEEKREITWKRLEELAAATKA-----VSSEAV  
 At\_Balpha 464 KSKQVEEQQRNRWRLEELAAVEERE-----  
 At\_Bbeta 464 KSKQVEEQQRQYTWKRLAELAAERDG-----  
 At\_Bepsilon 473 KACELLEQRELTWKRLEELAAASLAAN-----  
 Pp 469 KAKGVGEMRDLTWKRLEELAGNPRSNVGS-----OHTFASSHDV  
 M\_RCC299 394 RSQTEENRQQRWQVEELAAKSI-----  
 Vcfn 461 SERQAMENRDRKWEYLQKLALQKS-----  
 Cre 462 SERAAMETRDRKWEYLQKLAVQKS-----  
 At\_Bkapa 459 KQCSAAEKREKVEVWARLENAASMKP-----ITGKTAV  
 Hs\_PPP2R5C 473 KEKLMKEREELAVKLELAKANP-----  
 Dr\_gppp2r5cb 471 KEKAKWKEREELAVKLELAKSNPQFLMYIDANSLCSPMDMETDGPMLDVLMLKKTVEE  
 Hs\_Bdelta 494 KGRFRMKEREEMWQLEELARLNQYPMFRAPPPLPPVYSMETETPTAEDIQLLKRTVET  
 Sc\_RTS1 693 ETQQRKVQREENWQKLEELYVKNLRINN-----DKDQYT  
 Kl 642 ENNRQKEREMNWQLELDYVSKLKIAE-----S-----  
 Eg 602 ESQKRREKREENWQLEELYVRNLHISS-----VDNPPVA  
 Sp\_par1 497 KKEDEEIIREERWTLELAKEN-----AMKLSQ  
 Mo 583 SAAAREAMREKWAATAEQANKRKANG-----SGEPSGPPTRLTQ  
 Nc 545 NAPAREAHRSQKWARLEELAKQRKVESG-----TSNGTSSIPARTTV

At\_Btheta 486 ---QKQKSSL-----  
 Al 489 ---QKQKSSL-----  
 Cr 489 ---QKQKSSL-----  
 Es 491 ---QKQKSSS-----  
 At\_Beta 507 ---RKAS-----  
 Csi 512 PVPQKVQSPSSG-----  
 Pv 507 LIGNKAPTRPSAG-----  
 Cs 513 LVSHKLPTRTASV-----  
 Sl 493 LVPSTGHSRT-----  
 Vv 513 LVP-----  
 Os 505 LVSRTLPRQSSAV-----  
 Zm 499 GAPNGKPSHAAG-----  
 Gm 514 LVSPTASHTPSGKASRAQLE-----  
 Cmsm 512 LVAPKVALRAPSG-----  
 At\_Bzeta 526 LVPRFVSSVNLTTSSSESTGS-----  
 At\_Bgamma 504 LVPRFSSSVTLATG--KTSGS-----  
 At\_Bdelta -----  
 Smo 457 LVMGMAPSFNQRTMVG-----  
 At\_Balpha 488 ---REDPMITS-----  
 At\_Bbeta 489 GGGEEEDHMITS-----  
 At\_Bepsilon -----  
 Pp 507 PNSTVVPKNAAGTRASVAA-----  
 M\_RCC299 418 -AS-----  
 Vcfn 485 -NGRPLPEVKPLSALLRV-----  
 Cre 486 -NGRPLPEVKPLSALLRV-----  
 At\_Bkapa 490 LVTFRATSIAC-----  
 Hs\_PPP2R5C 497 ---QAQKDPKDRPLARRKSELQDPHTKKALEAHGRADELA-SQDGR--  
 Dr\_gppp2r5cb 531 EATPLHREQRKERPLMRKSELQDTSVTKALETHRAEDMIGTQDGH--  
 Hs\_Bdelta 554 EAVQMLKDIKKEKVLRRKSELQDVYTIKALEAHKRAEFLTASQEAL-  
 Sc\_RTS1 726 IKNPELRNSFNTASENNTLNEENENDCDSEIQ-----  
 Kl -----  
 Eg 635 VDRIGTGDLH-----  
 Sp\_par1 527 NPPT----VHSTTERLKKLS-LDYTNG-----  
 Mo 623 NPMRLDEVHSDDNQKRLDLSLKLQDGERR--RPGMHDRQNSVGSNRSQR  
 Nc 587 HPLPRLEEVDGTEDNQKRLDLSLKLQDGRRERRPGMHERQSSVGSRSR-

**Supplemental Figure S7.** PP2A B'θ homolog sequences alignment. Sequences of full-length protein homologs were identified by BLAST, aligned by ClustalW/MEGA6 (Tamura et al., 2013), and conserved residues were shaded by BoxShade ([http://www.ch.embnet.org/software/BOX\\_form.html](http://www.ch.embnet.org/software/BOX_form.html)). For phylogenetic analysis and PTS1 conservation, see also Figure 5. The species abbreviations are as follows: At, *Arabidopsis thaliana*; Al, *Arabidopsis lyrata*; Cr, *Capsella rubella*; Es, *Eutrema salsugineum*; Csi, *Citrus sinensis*; Pv, *Phaseolus vulgaris*; Cs, *Cucumis sativus*; Sl, *Solanum lycopersicum*; Vv, *Vitis vinifera*; Os, *Oryza sativa*; Zm, *Zea mays*; Gm, *Glycine Max*; Cmsm, *Cucumis melo subsp. melo*; Smo, *Selaginella moellendorffii*; Pp, *Physcomitrella patens*; M. RCC299, *Micromonas.sp.RCC299*; Vcfn, *Volvox carteri f. nagariensis*; cre, *Chlamydomonas reinhardtii*; Hs, *Homo sapiens*; Dr, *Danio rerio*; Sc, *Saccharomyces cerevisiae*; Kl, *Kluyveromyces lactis*; Eg, *Eremothecium gossypii*; Sp, *Schizosaccharomyces pombe*; Mo, *Magnaporthe oryzae*; Nc, *Neurospora crassa*.

## LITERATURE CITED

- Heazlewood JL, Durek P, Hummel J, Selbig J, Weckwerth W, Walther D, Schulze WX** (2008) PhosPhAt: a database of phosphorylation sites in *Arabidopsis thaliana* and a plant-specific phosphorylation site predictor. *Nucleic Acids Res* **36**: D1015-1021
- Matre P, Meyer C, Lillo C** (2009) Diversity in subcellular targeting of the PP2A B'eta subfamily members. *Planta* **230**: 935-945
- Tamura K, Stecher G, Peterson D, Filipski A, Kumar S** (2013) MEGA6: Molecular Evolutionary Genetics Analysis version 6.0. *Mol Biol Evol* **30**: 2725-2729
- Waadt R, Schmidt LK, Lohse M, Hashimoto K, Bock R, Kudla J** (2008) Multicolor bimolecular fluorescence complementation reveals simultaneous formation of alternative CBL/CIPK complexes in planta. *Plant J* **56**: 505-516
- Zimmermann P, Hirsch-Hoffmann M, Hennig L, Gruissem W** (2004) GENEVESTIGATOR. *Arabidopsis* microarray database and analysis toolbox. *Plant Physiol* **136**: 2621-2632
